# Supplementary material for: Synergistic Effects of Scalp Acupuncture and Repetitive Transcranial Magnetic Stimulation on Cerebral Infarction: A Randomized Controlled Pilot Trial
Source: MDPI journal article supplement (doi:10.3390/brainsci10020087), 2020-02-07
Supplement: s1 [file s1]

**Supplementary Table S1.** CONSORT 2010 checklist of information to include when reporting a randomized trial.

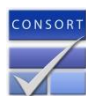

## CONSORT 2010 checklist of information to include when reporting a randomised trial\*

| Section/Topic                                        | Item No | Checklist item                                                                                                                                                                              | Reported on page No |
|------------------------------------------------------|---------|---------------------------------------------------------------------------------------------------------------------------------------------------------------------------------------------|---------------------|
| <b>Title and abstract</b>                            |         |                                                                                                                                                                                             |                     |
|                                                      | 1a      | Identification as a randomised trial in the title                                                                                                                                           | 1                   |
|                                                      | 1b      | Structured summary of trial design, methods, results, and conclusions (for specific guidance see CONSORT for abstracts)                                                                     | 1                   |
| <b>Introduction</b>                                  |         |                                                                                                                                                                                             |                     |
| Background and objectives                            | 2a      | Scientific background and explanation of rationale                                                                                                                                          | 1-2                 |
|                                                      | 2b      | Specific objectives or hypotheses                                                                                                                                                           | 2                   |
| <b>Methods</b>                                       |         |                                                                                                                                                                                             |                     |
| Trial design                                         | 3a      | Description of trial design (such as parallel, factorial) including allocation ratio                                                                                                        | 2                   |
|                                                      | 3b      | Important changes to methods after trial commencement (such as eligibility criteria), with reasons                                                                                          | none                |
| Participants                                         | 4a      | Eligibility criteria for participants                                                                                                                                                       | 4                   |
|                                                      | 4b      | Settings and locations where the data were collected                                                                                                                                        | 3-4                 |
| Interventions                                        | 5       | The interventions for each group with sufficient details to allow replication, including how and when they were actually administered                                                       | 4-5                 |
| Outcomes                                             | 6a      | Completely defined pre-specified primary and secondary outcome measures, including how and when they were assessed                                                                          | 5-6                 |
|                                                      | 6b      | Any changes to trial outcomes after the trial commenced, with reasons                                                                                                                       | none                |
| Sample size                                          | 7a      | How sample size was determined                                                                                                                                                              | 6                   |
|                                                      | 7b      | When applicable, explanation of any interim analyses and stopping guidelines                                                                                                                | none                |
| <b>Randomisation:</b>                                |         |                                                                                                                                                                                             |                     |
| Sequence generation                                  | 8a      | Method used to generate the random allocation sequence                                                                                                                                      | 4                   |
|                                                      | 8b      | Type of randomisation; details of any restriction (such as blocking and block size)                                                                                                         | 4                   |
| Allocation concealment mechanism                     | 9       | Mechanism used to implement the random allocation sequence (such as sequentially numbered containers), describing any steps taken to conceal the sequence until interventions were assigned | 4                   |
| Implementation                                       | 10      | Who generated the random allocation sequence, who enrolled participants, and who assigned participants to interventions                                                                     | 4                   |
| Blinding                                             | 11a     | If done, who was blinded after assignment to interventions (for example, participants, care providers, those assessing outcomes) and how                                                    | 4                   |
|                                                      | 11b     | If relevant, description of the similarity of interventions                                                                                                                                 | none                |
| Statistical methods                                  | 12a     | Statistical methods used to compare groups for primary and secondary outcomes                                                                                                               | 6                   |
|                                                      | 12b     | Methods for additional analyses, such as subgroup analyses and adjusted analyses                                                                                                            | none                |
| <b>Results</b>                                       |         |                                                                                                                                                                                             |                     |
| Participant flow (a diagram is strongly recommended) | 13a     | For each group, the numbers of participants who were randomly assigned, received intended treatment, and were analysed for the primary outcome                                              | 6-7                 |
|                                                      | 13b     | For each group, losses and exclusions after randomisation, together with reasons                                                                                                            | 6-7                 |
| Recruitment                                          | 14a     | Dates defining the periods of recruitment and follow-up                                                                                                                                     | 6                   |
|                                                      | 14b     | Why the trial ended or was stopped                                                                                                                                                          | 6-7                 |
| Baseline data                                        | 15      | A table showing baseline demographic and clinical characteristics for each group                                                                                                            | Table 2             |
| Numbers analysed                                     | 16      | For each group, number of participants (denominator) included in each analysis and whether the analysis was by original assigned                                                            | Fig1                |

|                          |     |                                                                                                                                                   |              |
|--------------------------|-----|---------------------------------------------------------------------------------------------------------------------------------------------------|--------------|
|                          |     | groups                                                                                                                                            |              |
| Outcomes and estimation  | 17a | For each primary and secondary outcome, results for each group, and the estimated effect size and its precision (such as 95% confidence interval) | 9-15         |
|                          | 17b | For binary outcomes, presentation of both absolute and relative effect sizes is recommended                                                       | none         |
| Ancillary analyses       | 18  | Results of any other analyses performed, including subgroup analyses and adjusted analyses, distinguishing pre-specified from exploratory         | none         |
| Harms                    | 19  | All important harms or unintended effects in each group (for specific guidance see CONSORT for harms)                                             | 15           |
| <b>Discussion</b>        |     |                                                                                                                                                   |              |
| Limitations              | 20  | Trial limitations, addressing sources of potential bias, imprecision, and, if relevant, multiplicity of analyses                                  | 16-17        |
| Generalisability         | 21  | Generalisability (external validity, applicability) of the trial findings                                                                         | 15           |
| Interpretation           | 22  | Interpretation consistent with results, balancing benefits and harms, and considering other relevant evidence                                     | 15-16        |
| <b>Other information</b> |     |                                                                                                                                                   |              |
| Registration             | 23  | Registration number and name of trial registry                                                                                                    | 3            |
| Protocol                 | 24  | Where the full trial protocol can be accessed, if available                                                                                       | Reference 25 |
| Funding                  | 25  | Sources of funding and other support (such as supply of drugs), role of funders                                                                   | 17           |

\*We strongly recommend reading this statement in conjunction with the CONSORT 2010 Explanation and Elaboration for important clarifications on all the items. If relevant, we also recommend reading CONSORT extensions for cluster randomised trials, non-inferiority and equivalence trials, non-pharmacological treatments, herbal interventions, and pragmatic trials. Additional extensions are forthcoming: for those and for up to date references relevant to this checklist, see [www.consort-statement.org](http://www.consort-statement.org).

**Supplementary Table S2.** Revised Standards for Reporting Intervention in Clinical Trials of Acupuncture (STRICTA).

|                          | Item Criteria                                                                                                                                       | Description                                                                                                                                                                                                                                            |
|--------------------------|-----------------------------------------------------------------------------------------------------------------------------------------------------|--------------------------------------------------------------------------------------------------------------------------------------------------------------------------------------------------------------------------------------------------------|
| 1. Acupuncture rationale | 1a) Style of acupuncture                                                                                                                            | Korean Medicine Therapy                                                                                                                                                                                                                                |
|                          | 1b) Reasoning for treatment provided – based on historical context, literature sources, and/or consensus methods, with references where appropriate | 1) Discussion among four doctors that practice Korean medicine (consensus)<br>2) Textbook of acupuncture and moxibustion medicine<br>3) Relevant articles<br>Selection of treatment regions based on textbooks, related papers, and expert discussions |
|                          | 1c) Extent to which treatment varied                                                                                                                | Standardized treatment                                                                                                                                                                                                                                 |
| 2. Details of needling   | 2a) Number of needle insertions per subject per session (mean and range where relevant)                                                             | 2–4                                                                                                                                                                                                                                                    |
|                          | 2b) Names (or location if no standard name) of points used (uni-/bilateral)                                                                         | SIAN's MS6; MS7 of the lesional hemisphere                                                                                                                                                                                                             |
|                          | 2c) Depth of insertion, based on a specified unit of measurement or on a particular tissue level                                                    | Needles were horizontally inserted into the subcutaneous tissue of the scalp, about 3 cm deep.                                                                                                                                                         |
|                          | 2d) Responses sought                                                                                                                                | No de qi or muscle twitching – only sensation due to needle insertion                                                                                                                                                                                  |
|                          | 2e) Needle stimulation                                                                                                                              | None                                                                                                                                                                                                                                                   |
|                          | 2f) Needle retention time                                                                                                                           | 20-min per session                                                                                                                                                                                                                                     |
|                          | 2g) Needle type                                                                                                                                     | KOS92 nonmagnetic steel disposable needles (0.25-mm diameter and 30-mm long), manufactured by Dong Bang Acupuncture, Inc.                                                                                                                              |
| 3. Treatment regimen     | 3a) Number of treatment sessions                                                                                                                    | 15                                                                                                                                                                                                                                                     |
|                          | 3b) Frequency and duration of treatment sessions                                                                                                    | Five times/week for 3 weeks, 20-min per session                                                                                                                                                                                                        |
| 4. Other treatment       | 4a) Details of other interventions administered to the acupuncture group                                                                            | Conventional stroke rehabilitation therapy                                                                                                                                                                                                             |

|                                        |                                                                                                                                                                  |                                                                                                                                                                                                                                                                                                                                                                                                    |
|----------------------------------------|------------------------------------------------------------------------------------------------------------------------------------------------------------------|----------------------------------------------------------------------------------------------------------------------------------------------------------------------------------------------------------------------------------------------------------------------------------------------------------------------------------------------------------------------------------------------------|
| components                             | 4b) Setting and context of treatment – including instructions to practitioners – as well as information and explanations given to patients                       | Practitioner-patient conversation about the context of the treatment, life habits, and daily life management                                                                                                                                                                                                                                                                                       |
| 5. Practitioner background             | 5a) Description of participating acupuncturists                                                                                                                  | Korean medicine doctor with the following qualifications: 6 years of formal university training in Korean medicine, a license, and at least 2 years of clinical experience                                                                                                                                                                                                                         |
| 6. Control or comparator interventions | 6a) Rationale for the control or comparator in the context of the research question, with sources that justify the choice                                        | Wang Y, Shen J, Wang XM, Fu DL, Chen CY, Lu LY et al. Scalp Acupuncture for Acute Ischemic Stroke: A Meta-Analysis of Randomized Controlled Trials. Evid Based Complement Altern Med 2012;2012:480950.: Lee SJ, Shin BC, Lee MS, Han CH, Kim JI. Scalp acupuncture for stroke recovery: A systematic review and meta-analysis of randomized controlled trials. European J Integr Med. 2013;5:87-99 |
|                                        | 6b) Precise description of the control or comparator; details for items 1–3 above with the use of sham acupuncture or any other type of acupuncture-like control | Conventional stroke rehabilitation therapy for control, rTMS, and SAEM-CS groups. LF-rTMS applied to the hot spot of the M1 region (the motor cortex at the contralesional hemisphere) for the rTMS group and LF-rTMS applied to the same M1 and simultaneous SA stimulation over the upper MS6 and MS7 region of the lesional hemisphere for the SAEM-CS group.                                   |

**Supplementary Table S3.** Changes in outcome measures after treatment completion in four group.

| Group<br>s       | Dependent<br>Variables           | Week 0<br>(M±SD) | Week 3<br>(M±SD) | Week 7<br>(M±SD) | Defference<br>(W3-W0) | Defference<br>(W7-W0) | $\chi^2(P)$      |
|------------------|----------------------------------|------------------|------------------|------------------|-----------------------|-----------------------|------------------|
| Control<br>group | FMA<br>Upper<br>Affected<br>side | 44.42±26.57      | 49.58±24.33      | 50.25±23.64      | 5.17±10.53            | 5.83±11.30            | 9.15 (.010)      |
|                  | FMA<br>Lower<br>Affected<br>side | 19.33±11.22      | 24.50±10.41      | 24.67±10.19      | 5.17±4.17             | 5.33±6.40             | 8.83 (.012)      |
|                  | FMA Total<br>Affected<br>side    | 63.75±36.00      | 74.08±33.22      | 74.92±31.13      | 10.33±12.87           | 11.17±13.07           | 11.87(.003)      |
|                  | NIHSS                            | 3.50±4.46        | 3.33±4.03        | 2.00±2.70        | -0.17±3.46            | -1.50±2.32            | 4.00 (.135)      |
|                  | MBI                              | 65.58±18.92      | 72.42±23.19      | 81.50±18.53      | 6.83±13.16            | 15.92±11.94           | 17.55<br>(<.001) |
|                  | FIM                              | 93.83±16.72      | 101.00±20.53     | 107.33±17.52     | 7.17±13.54            | 13.50±11.44           | 6.53 (.038)      |
|                  | Nine-hole                        | 93.65±39.18      | 66.59±35.87      | 58.72±38.28      | -27.06±33.08          | -34.93±37.61          | 12.67(.002)      |
|                  | AHSA-<br>NOMS                    | 6.83±0.58        | 7.00±0.00        | -                | 0.17±0.58             | -                     | -                |
|                  | FAC                              | 2.08±1.83        | 2.50±2.07        | -                | 0.42±1.00             | -                     | -                |
|                  | mRS                              | 3.08±0.90        | 3.08±1.44        | 2.50±1.45        | 0.00±1.21             | -0.58±1.00            | 5.17 (.076)      |
|                  | EQ-5D                            | 9.75±2.73        | 9.25±2.14        | 9.08±2.97        | 9.83±1.64             | 9.67±2.61             | 2.33 (.311)      |
|                  | K-MMSE                           | 26.42±3.75       | 26.42±3.48       | -                | 0.00±3.07             | -                     | -                |
|                  | MAS Elbow                        | 0.08±0.29        | 0.17±0.39        | 0.17±0.39        | 0.08±0.51             | 0.08±0.51             | 0.40 (.819)      |
|                  | MAS Ankle                        | 0.25±0.62        | 0.33±0.65        | 0.25±0.62        | 0.08±0.51             | 0.00±0.43             | 0.50 (.779)      |
|                  | Griptest<br>Dominant -<br>hand   | 31.17±18.15      | 28.92±14.32      | 29.50±13.28      | -2.25±7.53            | -1.67±7.11            | 0.30 (.862)      |
|                  |                                  |                  |                  |                  |                       |                       |                  |

|             |                                                  |                   |                   |                   |                   |               |                   |
|-------------|--------------------------------------------------|-------------------|-------------------|-------------------|-------------------|---------------|-------------------|
| SA<br>group | Griptest<br>Non<br>Dominant –<br>hand            | 13.50±15.56       | 15.00±12.66       | 18.42±13.39       | 1.50±9.79         | 4.92±16.23    | 0.20 (.905)       |
|             | APB<br>recording<br>Corticalstim<br>latency      | 11.83±12.43       | 9.91±12.31        | 9.89±12.34        | -1.93±6.54        | -1.94±7.16    | 2.00 (.368)       |
|             | APB<br>recording<br>Corticalstim<br>Amplitude    | 258.33±412.7<br>1 | 409.67±675.5      | 273.33±435.6<br>4 | 151.33±421.8<br>0 | 15.00±252.13  | 1.00 (.607)       |
|             | AH<br>recording<br>Cortical<br>stim latency      | 22.68±22.58       | 25.94±23.05       | 22.03±23.08       | 3.27±22.33        | -0.65±2.31    | 0.84 (.657)       |
|             | AH<br>recording<br>Cortical<br>stim<br>Amplitude | 294.50±471.4<br>6 | 353.08±586.7<br>5 | 255.42±338.3<br>9 | 353.73±586.0<br>8 | -39.08±325.71 | 2.77 (.250)       |
|             | FMA Upper<br>Affected<br>side                    | 26.18±29.20       | 35.27±24.41       | 39.36±25.24       | 9.09±8.60         | 13.18±15.72   | 14.00(.001)       |
|             | FMA Lower<br>Affected<br>side                    | 19.27±8.97        | 25.27±10.11       | 24.55±10.53       | 6.00±4.67         | 5.27±4.41     | 9.14(.010)        |
|             | FMA Total<br>Affected<br>Side                    | 45.45±36.05       | 60.55±32.15       | 63.91±35.02       | 15.09±11.89       | 18.45±17.01   | 12.05(.002)       |
|             | NIHSS                                            | 5.73±3.77         | 3.09±3.91         | 3.36±4.08         | -2.64±2.69        | -2.36±2.46    | 9.56(..008)       |
|             | MBI                                              | 55.36±23.08       | 69.73±29.07       | 74.00±29.36       | 14.36±11.74       | 18.64±18.21   | 11.46(..003)      |
|             | FIM                                              | 87.36±21.46       | 98.00±23.23       | 102.45±23.70      | 10.64±8.63        | 15.09±15.12   | 10.369(..006<br>) |
|             | Nine-hole                                        | 89.43±42.73       | 87.59±45.37       | 88.94±43.88       | -1.84±3.63        | -0.49±3.76    | 3.50(..174)       |
|             | AHSA-<br>NOMS                                    | 6.45±0.93         | 6.73±0.65         | -                 | 0.27±1.01         | -             | -                 |
|             | FAC                                              | 1.18±1.78         | 2.64±2.06         | -                 | 1.45±1.51         | -             | -                 |
|             | mRS                                              | 3.45±0.69         | 3.18±1.60         | 2.80±1.48         | -0.27±1.42        | -0.91±1.76    | 0.50(.779)        |

|            |                                      |               |               |               |               |               |              |
|------------|--------------------------------------|---------------|---------------|---------------|---------------|---------------|--------------|
| rTMS group | EQ-5D                                | 9.73±3.41     | 10.00±2.14    | 10.55±2.46    | 10.91±2.34    | 11.45±2.42    | 1.56(,.458)  |
|            | K-MMSE                               | 25.00±4.56    | 24.91±5.75    | -             | -0.09±3.70    | -             | -            |
|            | MAS Elbow                            | 0.45±0.93     | 0.55±0.69     | 0.36±0.50     | 0.09±0.54     | -0.09±0.70    | 1.40(.497)   |
|            | MAS Ankle                            | 0.36±0.67     | 0.27±0.47     | 0.36±0.50     | -0.09±0.83    | 0.00±0.77     | 0.40(.819)   |
|            | Griptest Dominant - hand             | 27.91±9.68    | 32.55±18.45   | 29.36±13.17   | 4.64±14.29    | 1.45±6.58     | 0.61(.739)   |
|            | Griptest Non Dominant – hand         | 10.91±16.18   | 11.36±17.18   | 11.45±17.01   | 0.45±4.08     | 0.55±4.25     | 1.39(.499)   |
|            | APB recording Corticalstim latency   | 8.31±11.56    | 10.48±12.08   | 10.37±11.95   | 2.17±7.54     | 2.06±6.91     | 0.00(1.00)   |
|            | APB recording Corticalstim Amplitude | 372.73±567.00 | 407.64±615.19 | 492.82±843.53 | 34.91±130.93  | 120.09±630.49 | 0.40(.819)   |
|            | AH recording Cortical stim latency   | 23.47±22.63   | 23.45±22.76   | 23.87±23.07   | -0.03±21.05   | 0.40±20.92    | 0.92(.630)   |
|            | AH recording Cortical stim Amplitude | 144.09±181.25 | 150.18±216.32 | 255.45±376.84 | 149.78±214.39 | 111.36±266.37 | 0.67(.717)   |
|            | FMA Upper Affected side              | 33.13±19.40   | 50.13±10.78   | 56.50±9.70    | 17.00±13.89   | 23.38±14.70   | 13.61(.001)  |
|            | FMA Lower Affected side              | 19.63±8.77    | 24.50±5.86    | 28.25±6.78    | 4.88±6.49     | 8.63±5.24     | 10.13(.006)  |
|            | FMA Total Affected Side              | 52.75±25.02   | 74.63±15.22   | 84.88±14.24   | 21.88±17.67   | 32.13±17.27   | 12.25(.002)  |
|            | NIHSS                                | 5.13±3.23     | 2.88±2.36     | 2.00±1.85     | -2.25±1.75    | -3.13±1.73    | 12.29(.002)  |
|            | MBI                                  | 41.63±22.60   | 67.38±19.94   | 85.13±11.68   | 25.75±10.01   | 43.50±16.64   | 15.55(<.001) |

|               |                                      |               |               |               |               |                    |              |
|---------------|--------------------------------------|---------------|---------------|---------------|---------------|--------------------|--------------|
|               | FIM                                  | 75.38±13.20   | 97.75±14.74   | 111.50±8.49   | 22.38±4.66    | 36.13±6.88         | 15.55(<.001) |
|               | Nine-hole                            | 108.75±31.83  | 83.30±40.88   | 68.56±37.29   | -25.45±34.42  | -40.19±35.61       | 11.27(.004)  |
|               | AHSA-NOMS                            | 5.38±1.92     | 6.50±0.76     | -             | 0.13±2.03     | -                  | -            |
|               | FAC                                  | 1.38±1.51     | 2.63±1.60     | -             | 1.25±1.04     | -                  | -            |
|               | mRS                                  | 3.63±0.52     | 2.88±1.36     | 2.63±1.06     | -0.75±1.16    | -1.00±0.76         | 7.52(.023)   |
|               | EQ-5D                                | 12.13±1.64    | 10.00±2.45    | 9.13±1.25     | 11.00±2.27    | 10.13±1.46         | 11.47(.003)  |
|               | K-MMSE                               | 26.13±3.52    | 26.50±3.7     | -             | 0.38±2.07     | -                  | -            |
|               | MAS Elbow                            | 0.13±0.35     | 0.63±0.52     | 0.75±0.71     | 0.50±0.53     | 0.63±0.74          | 5.33(.069)   |
|               | MAS Ankle                            | 0.00±0.00     | 0.50±0.54     | 0.38±0.52     | 0.50±0.53     | 0.38±0.52          | 5.20(.074)   |
|               | Griptest Dominant - hand             | 25.63±13.74   | 28.38±11.62   | 27.38±9.77    | 2.75±8.19     | 1.75±7.19          | 0.45(.798)   |
|               | Griptest Non Dominant – hand         | 6.50±9.35     | 9.88±7.90     | 7.88±5.41     | 3.38±6.57     | 1.38±7.50          | 0.69(.707)   |
|               | APB recording Corticalstim latency   | 9.45±13.12    | 14.79±12.35   | 18.29±11.44   | 5.34±10.58    | 8.84±12.66         | 4.26(.119)   |
|               | APB recording Corticalstim Amplitude | 188.00±449.58 | 297.75±459.71 | 441.75±416.07 | 109.75±138.34 | 253.75±573.24      | 6.35(.042)   |
|               | AHrecording Corticalstim latency     | 20.53±24.30   | 15.91±22.13   | 28.36±24.11   | -4.61±20.52   | 7.84±20.38         | 0.95(.623)   |
|               | AHrecording Corticalstim Amplitude   | 201.63±353.65 | 90.88±143.49  | 98.50±102.30  | 83.04±150.54  | -<br>103.13±305.58 | 0.11(.949)   |
| SAEM-CS group | FMA Upper Affected side              | 42.64±27.21   | 44.91±27.72   | 47.64±25.32   | 2.27±7.28     | 5.00±6.80          | 7.60(.022)   |

|                                             |             |              |              |              |              |              |
|---------------------------------------------|-------------|--------------|--------------|--------------|--------------|--------------|
| FMA Lower<br>Affected<br>side               | 19.45±12.89 | 23.64±11.24  | 25.36±10.57  | 4.18±5.65    | 5.91±6.50    | 10.07(.007)  |
| FMA Total<br>Affected<br>Side               | 62.09±39.03 | 68.55±38.39  | 73.00±35.56  | 6.45±12.11   | 10.91±12.43  | 9.63(.008)   |
| NIHSS                                       | 4.18±4.77   | 4.00±4.02    | 3.64±4.48    | -0.18±1.89   | -0.55±1.92   | 2.23(.328)   |
| MBI                                         | 57.55±30.27 | 73.09±25.99  | 80.55±27.19  | 15.55±14.98  | 23.00±16.12  | 17.05(<.001) |
| FIM                                         | 85.73±35.99 | 101.64±22.55 | 107.91±23.36 | 15.91±21.14  | 22.18±20.84  | 16.60(<.001) |
| Nine-hole                                   | 81.90±42.01 | 63.19±39.08  | 64.56±45.76  | -18.70±36.07 | -17.34±51.43 | 7.00(.030)   |
| AHSA-<br>NOMS                               | 6.45±0.82   | 6.64±0.92    | -            | 0.18±0.75    | -            | -            |
| FAC                                         | 1.73±1.68   | 2.73±2.01    | -            | 1.00±1.61    | -            | -            |
| mRS                                         | 3.27±0.79   | 3.09±1.30    | 2.55±1.63    | -0.18±1.08   | -0.73±1.49   | 2.60(.273)   |
| EQ-5D                                       | 10.09±3.27  | 9.00±3.13    | 9.45±3.70    | 9.73±2.65    | 10.18±3.19   | 7.40(.025)   |
| K-MMSE                                      | 23.00±4.29  | 25.09±3.33   | -            | 2.09±1.92    | -            | -            |
| MAS Elbow                                   | 0.27±0.47   | 0.45±0.82    | 0.18±0.40    | 0.18±0.75    | -0.09±0.30   | 1.50(.472)   |
| MAS Ankle                                   | 0.36±0.50   | 0.55±0.82    | 0.27±0.65    | 0.18±0.60    | -0.09±0.54   | 2.80(.247)   |
| Griptest<br>Dominant -<br>hand              | 20.55±9.72  | 21.73±7.77   | 21.45±9.40   | 1.18±4.58    | 0.91±5.94    | 0.06(.973)   |
| Griptest<br>Non<br>Dominant –<br>hand       | 10.64±10.27 | 11.45±10.83  | 12.45±11.20  | 0.82±3.71    | 1.82±5.86    | 1.40(.497)   |
| APB<br>recording<br>Corticalstim<br>latency | 12.33±11.86 | 14.70±11.73  | 16.83±10.89  | 2.37±12.60   | 4.50±10.16   | 1.75(.417)   |



|                                               |                   |                   |                   |                   |                   |            |
|-----------------------------------------------|-------------------|-------------------|-------------------|-------------------|-------------------|------------|
| APB<br>recording<br>Corticalstim<br>Amplitude | 576.73±781.2<br>0 | 266.00±241.0<br>9 | 882.45±949.4<br>7 | 310.73±808.5<br>3 | 305.73±442.5<br>4 | 5.25(.072) |
| AHrecordin<br>g Cortical<br>stim latency      | 14.52±20.20       | 15.05±20.93       | 15.23±21.21       | 0.54±18.52        | 0.71±1.25         | 4.11(.128) |
| AHrecordin<br>g Cortical<br>stim<br>Amplitude | 238.55±362.5<br>6 | 156.91±265.2<br>0 | 264.91±413.4<br>3 | 156.20±264.0<br>8 | 26.36±279.46      | 0.11(.949) |
